# Supplementary material
Source: PubMed Central journal article supplement (PMC3807936)
Supplement: JVI.01845-13_zjv999098292so1.pdf [file JVI.01845-13_zjv999098292so1.pdf]

### Supplementary Table Oligonucleotides used for cDNA synthesis and gene amplification

| Purpose           | Primer designation | Oligonucleotide sequence (5' to 3') <sup>a,b</sup>               | Polarity |
|-------------------|--------------------|------------------------------------------------------------------|----------|
| cDNA synthesis    | SA1-ORF3ABCD-R     | GAATAAAGTGGGAACGCATGTC                                           | Reverse  |
| pCAGGS-FLAG-ORF3  | 3A_FlagN_EcoRI-F   | <u>CCGGAATTCGCCACCATG</u> <u>gattacaaggatgacgatgacaagggaggcA</u> | Forward  |
|                   | 3A_NotI_R          | GAGTTCAAAGACCACCCACT                                             |          |
| pCAGGS-FLAG-ORF4a | 3B_FlagN_EcoRI-F   | <u>AGTT GCG GCC GCT</u> TAA TTA ACT GAG TAA CCA ACG TCA A        | Reverse  |
|                   | 3B_NotI_R          | <u>CCGGAATTCGCCACCATG</u> <u>gattacaaggatgacgatgacaagggaggcG</u> | Forward  |
|                   | 3B_FlagN_EcoRI-F   | ATTACGTGTCTCTGCTTAATCAA                                          |          |
| pCAGGS-FLAG-ORF4b | 3C_FlagN_EcoRI-F   | <u>AGTT GCG GCC GCT</u> TAG TTG GAG AAT GGC TCC TCT T            | Reverse  |
|                   | 3C_NotI_R          | <u>CCGGAATTCGCCACCATG</u> <u>gattacaaggatgacgatgacaagggaggcG</u> | Forward  |
|                   |                    | AGGAATCCCTGATGGATGTTT                                            |          |
|                   |                    | <u>AGTT GCG GCC GCT</u> TAA AAT CCT GGA TGA TGT AAA ATG G        | Reverse  |

<sup>a</sup>Underlined nucleotides were added for cloning purposes

<sup>b</sup>FLAG-tag is shown in small letters
